# Supplementary material for: Timosaponin AIII Is Preferentially Cytotoxic to Tumor Cells through Inhibition of mTOR and Induction of ER Stress
Source: PubMed Central journal article supplement (PMC2747272; doi:10.1371/journal.pone.0007283), 2009-09-30
Supplement: pone.0007283.s001.pdf [file pone.0007283.s001.pdf]

Table S1 Expression changes induced in BT474 cells treated with BN108

UPREGULATED GENES

| ENTREZ ID | ENTREZ GEN | ENTREZ GENE DESCRIPTION                                                          | Fold up | GeneBank ID |
|-----------|------------|----------------------------------------------------------------------------------|---------|-------------|
| 1545      | CYP1B1     | cytochrome P450, family 1, subfamily B, polypeptide 1                            | 5.5     | NM_000104   |
| 55902     | ACAS2      | acetyl-Coenzyme A synthetase 2 (ADP forming)                                     | 5.1     | NM_018677   |
| 11182     | SLC2A6     | solute carrier family 2 (facilitated glucose transporter), member 6              | 4.7     | NM_017585   |
| 158471    | C9orf65    | chromosome 9 open reading frame 65                                               | 4.0     | NM_138818   |
| 23175     | LPIN1      | lipin 1                                                                          | 3.8     | NM_145693   |
| 1543      | CYP1A1     | cytochrome P450, family 1, subfamily A, polypeptide 1                            | 3.7     | NM_000499   |
| 3422      | IDI1       | isopentenyl-diphosphate delta isomerase                                          | 3.7     | NM_004508   |
| 6307      | SC4MOL     | sterol-C4-methyl oxidase-like                                                    | 3.6     | NM_006745   |
| 3157      | HMGCS1     | 3-hydroxy-3-methylglutaryl-Coenzyme A synthase 1 (soluble)                       | 3.6     | BX537620    |
| 333929    | SNAI3      | snail homolog 3 (Drosophila)                                                     | 3.4     | AY203928    |
| 255738    | PCSK9      | proprotein convertase subtilisin/kexin type 9                                    | 3.2     | NM_174936   |
| 2224      | FDPS       | farnesyl diphosphate synthase (farnesyl pyrophosphate synthetase, dimethylallyl) | 3.1     | AK021828    |
| 51478     | HSD17B7    | hydroxysteroid (17-beta) dehydrogenase 7                                         | 3.0     | AK022929    |
| 9518      | GDF15      | growth differentiation factor 15                                                 | 3.0     | NM_004864   |
| 54785     | FLJ20014   | hypothetical protein FLJ20014                                                    | 2.9     | NM_017622   |
| 2810      | SFN        | stratifin                                                                        | 2.8     | NM_006142   |
| 3638      | INSIG1     | insulin induced gene 1                                                           | 2.7     | NM_005542   |
| 81558     | LOC81558   | C/EBP-induced protein                                                            | 2.7     | NM_030802   |
| 339924    | LOC339924  | hypothetical protein LOC339924                                                   | 2.7     | AK024270    |
| 54541     | DDIT4      | DNA-damage-inducible transcript 4                                                | 2.7     | NM_019058   |
| 1026      | CDKN1A     | cyclin-dependent kinase inhibitor 1A (p21, Cip1)                                 | 2.7     | NM_000389   |
| 51003     | MED31      | mediator of RNA polymerase II transcription, subunit 31 homolog (yeast)          | 2.6     | NM_016060   |
| 4597      | MVD        | mevalonate (diphospho) decarboxylase                                             | 2.5     | NM_002461   |
| 256933    | NPB        | preproneuropeptide B                                                             | 2.5     | BC073815    |
| 39        | ACAT2      | acetyl-Coenzyme A acetyltransferase 2 (acetoacetyl Coenzyme A thiolase)          | 2.5     | NM_005891   |
| 4047      | LSS        | lanosterol synthase (2,3-oxidosqualene-lanosterol cyclase)                       | 2.5     | NM_002340   |
| 901       | CCNG2      | cyclin G2                                                                        | 2.5     | AK092638    |
| 4598      | MVK        | mevalonate kinase (mevalonic aciduria)                                           | 2.4     | NM_000431   |
| 47        | ACLY       | ATP citrate lyase                                                                | 2.4     | NM_001096   |
| 51478     | HSD17B7    | hydroxysteroid (17-beta) dehydrogenase 7                                         | 2.2     | NM_016371   |
| 50814     | NSDHL      | NAD(P) dependent steroid dehydrogenase-like                                      | 2.2     | NM_015922   |
| 80153     | FLJ21128   | hypothetical protein FLJ21128                                                    | 2.2     | NM_025083   |
| 6812      | STXBP1     | syntaxin binding protein 1                                                       | 2.2     | NM_003165   |
| 10020     | GNB3       | glucosamine (UDP-N-acetyl)-2-epimerase/N-acetylmannosamine kinase                | 2.2     | NM_005476   |
| 901       | CCNG2      | cyclin G2                                                                        | 2.2     | NM_004354   |
| 8353      | HIST1H3E   | histone 1, H3e                                                                   | 2.2     | BG676315    |
| 39        | ACAT2      | acetyl-Coenzyme A acetyltransferase 2 (acetoacetyl Coenzyme A thiolase)          | 2.1     | NM_005891   |
| 8218      | CLTCL1     | clathrin, heavy polypeptide-like 1                                               | 2.1     | NM_001835   |
| 6309      | SC5DL      | sterol-C5-desaturase (ERG3 delta-5-desaturase homolog, fungal)-like              | 2.1     | NM_006918   |
| 25976     | TIPARP     | TCDD-inducible poly(ADP-ribose) polymerase                                       | 2.1     | NM_015508   |
| 440433    | LOC440433  | hypothetical gene supported by AK092630                                          | 2.1     | AL832615    |

DOWNREGULATED GENES

| ENTREZ ID | ENTREZ GEN | ENTREZ GENE DESCRIPTION                                 | Fold down | GeneBank ID |
|-----------|------------|---------------------------------------------------------|-----------|-------------|
| 22943     | DKK1       | dickkopf homolog 1 (Xenopus laevis)                     | 3.5       | NM_012242   |
| 7057      | THBS1      | thrombospondin 1                                        | 3.0       | NM_003246   |
| 3491      | CYR61      | cysteine-rich, angiogenic inducer, 61                   | 2.9       | NM_001554   |
| 407975    | C13orf25   | chromosome 13 open reading frame 25                     | 2.5       | NM_213723   |
| 79642     | FLJ23548   | hypothetical protein FLJ23548                           | 2.4       | NM_024590   |
| 285489    | FLJ33718   | hypothetical protein FLJ33718                           | 2.4       | NM_173660   |
| 374       | AREG       | amphiregulin (schwannoma-derived growth factor)         | 2.3       | NM_001657   |
| 57795     | KIAA1747   | hypothetical protein from clone 24828                   | 2.3       | NM_021165   |
| 4609      | MYC        | v-myc myelocytomatosis viral oncogene homolog (avian)   | 2.2       | NM_002467   |
| 9052      | GPCR5A     | G protein-coupled receptor, family C, group 5, member A | 2.2       | NM_003979   |

|        |           |                                                                   |     |           |
|--------|-----------|-------------------------------------------------------------------|-----|-----------|
| 10252  | SPRY1     | sprouty homolog 1, antagonist of FGF signaling (Drosophila)       | 2.1 | NM_005841 |
| 6387   | CXCL12    | chemokine (C-X-C motif) ligand 12 (stromal cell-derived factor 1) | 2.1 | NM_000609 |
| 285958 | LOC285958 | hypothetical protein LOC285958                                    | 2.1 | AK096179  |
| 374    | AREG      | amphiregulin (schwannoma-derived growth factor)                   | 2.1 | NM_001657 |
| 7424   | VEGFC     | vascular endothelial growth factor C                              | 2.0 | NM_005429 |
| 79888  | FLJ12443  | hypothetical protein FLJ12443                                     | 2.0 | NM_024830 |
| 441951 | LOC441951 | similar to RPE-spondin                                            | 2.0 | AK124175  |
| 6130   | RPL7A     | ribosomal protein L7a                                             | 2.0 | BX641050  |
| 9334   | B4GALT5   | UDP-Gal:betaGlcNAc beta 1,4- galactosyltransferase, polypeptide 5 | 2.0 | NM_004776 |
| 595    | CCND1     | cyclin D1 (PRAD1: parathyroid adenomatosis 1)                     | 2.0 | NM_053056 |
| 390    | ARHE      | ras homolog gene family, member E                                 | 2.0 | NM_005168 |
| 799    | CALCR     | calcitonin receptor                                               | 2.0 | NM_001742 |
