# Supplementary material for: Timosaponin AIII Is Preferentially Cytotoxic to Tumor Cells through Inhibition of mTOR and Induction of ER Stress
Source: PubMed Central journal article supplement (PMC2747272; doi:10.1371/journal.pone.0007283), 2009-09-30
Supplement: pone.0007283.s002.pdf [file pone.0007283.s002.pdf]

Table S2

Expression analysis data of genes affected by TAI11 in BT474, MDAMB231 and MCF10A cells

Genes upregulated by TAI11; Ranked by fold change in BT474

| TargetID  | Accession    | GeneDescription                                                            | BT474 | MDAMB231 | MCF10a |
|-----------|--------------|----------------------------------------------------------------------------|-------|----------|--------|
| RN7SK     | NR_001445.1  | RNA, 7SK, nuclear                                                          | 24.27 | 1.67     | 0.70   |
| INSIG1    | NM_198337.1  | insulin induced gene 1                                                     | 8.71  | 6.14     | 1.84   |
| SC4MOL    | NM_006745.3  | sterol-C4-methyl oxidase-like                                              | 7.64  | 2.07     | 1.35   |
| LPIN1     | NM_145693.1  | lipin 1                                                                    | 6.69  | 2.31     | 2.22   |
| LOC153222 | NM_153607.1  | chromosome 5 open reading frame 41                                         | 6.28  | 5.44     | 2.74   |
| SC4MOL    | NM_006745.3  | sterol-C4-methyl oxidase-like                                              | 6.10  | 2.08     | 1.24   |
| IRS2      | NM_003749.2  | insulin receptor substrate 2                                               | 5.86  | 1.47     | 1.44   |
| HSD17B7   | NM_016371.2  | hydroxysteroid (17-beta) dehydrogenase 7                                   | 5.10  | 1.33     | 1.54   |
| HSD17B7P2 | NR_003086.1  | hydroxysteroid (17-beta) dehydrogenase 7 pseudogene 2                      | 4.73  | 0.98     | 1.10   |
| INSIG1    | NM_198336.1  | insulin induced gene 1                                                     | 4.72  | 4.33     | 1.70   |
| ID11      | NM_004508.2  | isopentenyl-diphosphate delta isomerase 1                                  | 4.50  | 1.80     | 1.19   |
| ATF3      | NM_001674.2  | activating transcription factor 3                                          | 4.48  | 13.41    | 3.30   |
| RNF39     | NM_025236.2  | ring finger protein 39                                                     | 4.35  | 0.92     | 1.24   |
| KLHL24    | NM_017644.3  | kelch-like 24 (Drosophila)                                                 | 4.25  | 2.37     | 1.35   |
| HMGCS1    | NM_002130.4  | 3-hydroxy-3-methylglutaryl-Coenzyme A synthase 1 (soluble)                 | 4.23  | 2.06     | 1.51   |
| PIM1      | NM_002648.2  | pim-1 oncogene                                                             | 4.13  | 3.57     | 1.76   |
| MVD       | NM_002461.1  | mevalonate (diphospho) decarboxylase                                       | 3.95  | 1.20     | 1.39   |
| GNE       | NM_005476.3  | glucosamine (UDP-N-acetyl)-2-epimerase/N-acetylmannosamine kinase          | 3.83  | 1.49     | 0.98   |
| CREB5     | NM_182899.3  | cAMP responsive element binding protein 5                                  | 3.81  | 3.59     | 1.76   |
| CCDC28A   | NM_015439.2  | coiled-coil domain containing 28A                                          | 3.79  | 1.64     | 1.39   |
| HMGCR     | NM_000859.1  | 3-hydroxy-3-methylglutaryl-Coenzyme A reductase                            | 3.64  | 1.32     | 1.19   |
| LDLR      | NM_000527.2  | low density lipoprotein receptor (familial hypercholesterolemia)           | 3.54  | 2.37     | 1.70   |
| SQLE      | NM_003129.3  | squalene epoxidase                                                         | 3.32  | 1.05     | 1.27   |
| PGM2L1    | NM_173582.3  | phosphoglucomutase 2-like 1                                                | 3.30  | 1.65     | 1.59   |
| ACSS2     | NM_018677.2  | acyl-CoA synthetase short-chain family member 2                            | 3.24  | 1.38     | 1.55   |
| KLF2      | NM_016270.2  | Kruppel-like factor 2 (lung)                                               | 3.23  | 4.95     | 4.70   |
| HBP1      | NM_012257.3  | HMG-box transcription factor 1                                             | 3.13  | 2.46     | 1.43   |
| DHCR7     | NM_001360.1  | 7-dehydrocholesterol reductase                                             | 3.11  | 1.47     | 1.48   |
| JUN       | NM_002228.3  | jun oncogene                                                               | 3.05  | 1.27     | 1.23   |
| DUSP1     | NM_004417.2  | dual specificity phosphatase 1                                             | 2.98  | 3.68     | 1.86   |
| GRB7      | NM_005310.2  | growth factor receptor-bound protein 7                                     | 2.91  | 1.12     | 1.42   |
| SC5DL     | NM_001024956 | sterol-C5-desaturase (ERG3 delta-5-desaturase homolog, S. cerevisiae)-like | 2.91  | 1.67     | 1.88   |
| CAMTA1    | NM_015215.1  | calmodulin binding transcription activator 1                               | 2.85  | 1.17     | 0.80   |
| KLF6      | NM_001300.4  | Kruppel-like factor 6                                                      | 2.84  | 3.29     | 1.78   |
| KLHL28    | NM_017658.3  | kelch-like 28 (Drosophila)                                                 | 2.72  | 2.59     | 1.60   |
| ABTB1     | NM_172027.1  | ankyrin repeat and BTB (POZ) domain containing 1                           | 2.72  | 1.62     | 2.06   |
| YPEL2     | NM_001005404 | yippee-like 2 (Drosophila)                                                 | 2.71  | 1.67     | 1.20   |
| MNT       | NM_020310.2  | MAX binding protein                                                        | 2.67  | 2.41     | 1.56   |
| KLF6      | NM_001300.4  | Kruppel-like factor 6                                                      | 2.64  | 2.56     | 1.73   |
| ZFYVE1    | NM_178441.1  | zinc finger, FYVE domain containing 1                                      | 2.63  | 2.71     | 1.74   |
| ACSS2     | NM_018677.2  | acyl-CoA synthetase short-chain family member 2                            | 2.63  | 1.23     | 1.53   |
| KIAA0831  | NM_014924.3  | KIAA0831                                                                   | 2.55  | 1.43     | 1.13   |
| MGC17330  | NM_052880.3  | phosphoinositide-3-kinase interacting protein 1                            | 2.54  | 1.38     | 1.27   |
| CDKN1A    | NM_000389.2  | cyclin-dependent kinase inhibitor 1A (p21, Cip1)                           | 2.54  | 3.86     | 1.19   |
| FAM117A   | NM_030802.2  | family with sequence similarity 117, member A                              | 2.53  | 0.81     | 0.68   |
| RNF38     | NM_194329.2  | ring finger protein 38                                                     | 2.53  | 1.65     | 1.58   |
| HSPA6     | NM_002155.3  | heat shock 70kDa protein 6 (HSP70B')                                       | 2.53  | 1.17     | 2.26   |
| MEF2D     | NM_005920.2  | myocyte enhancer factor 2D                                                 | 2.51  | 1.84     | 1.53   |
| PRIC285   | NM_033405.2  | peroxisomal proliferator-activated receptor A interacting complex 285      | 2.51  | 2.44     | 1.76   |
| NSDHL     | NM_015922.1  | NAD(P) dependent steroid dehydrogenase-like                                | 2.51  | 0.82     | 1.18   |
| ZBTB34    | XM_937669.2  | zinc finger and BTB domain containing 34                                   | 2.49  | 1.86     | 1.95   |
| CYP51A1   | NM_000786.2  | cytochrome P450, family 51, subfamily A, polypeptide 1                     | 2.48  | 1.09     | 1.00   |
| SLU7      | NM_006425.4  | SLU7 splicing factor homolog (S. cerevisiae)                               | 2.48  | 1.55     | 1.05   |
| FOXO3A    | NM_201559.1  | forkhead box O3                                                            | 2.47  | 1.71     | 1.18   |
| GRB7      | NM_005310.2  | growth factor receptor-bound protein 7                                     | 2.47  | 0.84     | 1.64   |
| TRIM23    | NM_001656.3  | tripartite motif-containing 23                                             | 2.45  | 1.36     | 1.31   |
| TSC1      | NM_000368.3  | tuberous sclerosis 1                                                       | 2.43  | 1.79     | 1.46   |
| FBXO32    | NM_058229.2  | F-box protein 32                                                           | 2.40  | 1.85     | 1.45   |
| TRIM4     | NM_033017.2  | tripartite motif-containing 4                                              | 2.39  | 1.04     | 0.85   |
| DFIT1     | NM_004462.3  | farnesyl-diphosphate farnesyltransferase 1                                 | 2.38  | 1.24     | 1.12   |
| RBM33     | NM_001008408 | RNA binding motif protein 33                                               | 2.38  | 1.89     | 1.90   |
| IGF1R     | NM_000875.3  | insulin-like growth factor 1 receptor                                      | 2.36  | 1.38     | 1.32   |
| KIF3C     | NM_002254.5  | kinesin family member 3C                                                   | 2.33  | 0.96     | 0.82   |
| LRCH4     | NM_002319.2  | leucine-rich repeats and calponin homology (CH) domain containing 4        | 2.32  | 1.73     | 1.95   |
| FOXO3A    | NM_001455.2  | forkhead box O3                                                            | 2.32  | 1.87     | 1.45   |
| CLK1      | NM_004071.2  | CDC-like kinase 1                                                          | 2.31  | 1.60     | 1.42   |
| KREMEN2   | NM_145348.1  | Homo sapiens kringle containing transmembrane protein 2 (KREMEN2), transcr | 2.29  | 0.96     | 0.87   |
| NPC1      | NM_000271.2  | Niemann-Pick disease, type C1                                              | 2.29  | 1.37     | 1.48   |
| WDR19     | NM_025132.3  | WD repeat domain 19                                                        | 2.29  | 1.67     | 1.96   |

|           |              |                                                                                   |      |       |      |
|-----------|--------------|-----------------------------------------------------------------------------------|------|-------|------|
| YPEL1     | NM_013313.3  | yippee-like 1 (Drosophila)                                                        | 2.28 | 1.15  | 1.17 |
| RHOB      | NM_004040.2  | ras homolog gene family, member B                                                 | 2.28 | 15.34 | 2.52 |
| ARL6IP6   | NM_152522.2  | ADP-ribosylation-like factor 6 interacting protein 6                              | 2.27 | 1.33  | 1.26 |
| CLCN6     | NM_021735.1  | chloride channel 6                                                                | 2.27 | 1.48  | 1.66 |
| CD55      | NM_000574.2  | CD55 molecule, decay accelerating factor for complement (Cromer blood group)      | 2.27 | 1.63  | 1.98 |
| GDF15     | NM_004864.1  | growth differentiation factor 15                                                  | 2.27 | 3.14  | 1.69 |
| GABARAPL1 | NM_031412.2  | GABA(A) receptor-associated protein like 1                                        | 2.26 | 2.33  | 2.06 |
| CSTF3     | NM_001326.2  | cleavage stimulation factor, 3' pre-RNA, subunit 3, 77kDa                         | 2.26 | 1.51  | 1.43 |
| C17ORF59  | NM_017622.1  | chromosome 17 open reading frame 59                                               | 2.25 | 1.12  | 1.18 |
| CREB5     | NM_001011666 | cAMP responsive element binding protein 5                                         | 2.25 | 2.26  | 1.58 |
| BNIP1     | NM_138278.2  | BCL2/adenovirus E1B 19kD interacting protein like                                 | 2.24 | 1.47  | 2.06 |
| HSD17B7P2 | NR_003086.1  | hydroxysteroid (17-beta) dehydrogenase 7 pseudogene 2                             | 2.22 | 1.04  | 1.58 |
| CLK1      | NM_004071.2  | CDC-like kinase 1                                                                 | 2.21 | 1.16  | 1.34 |
| KIAA1666  | XM_942124.2  | RIMS binding protein 3                                                            | 2.21 | 1.62  | 0.76 |
| FRAT1     | NM_005479.2  | frequently rearranged in advanced T-cell lymphomas                                | 2.20 | 1.22  | 1.13 |
| ZBTB10    | NM_023929.2  | zinc finger and BTB domain containing 10                                          | 2.19 | 1.60  | 0.93 |
| ACTR6     | NM_022496.2  | ARP6 actin-related protein 6 homolog (yeast)                                      | 2.17 | 0.98  | 1.07 |
| LSS       | NM_002340.3  | lanosterol synthase (2,3-oxidosqualene-lanosterol cyclase)                        | 2.17 | 1.41  | 1.52 |
| EIF2AK3   | NM_004836.3  | eukaryotic translation initiation factor 2-alpha kinase 3                         | 2.17 | 1.29  | 1.76 |
| MGC14376  | NM_032895.2  | chromosome 17 open reading frame 91                                               | 2.16 | 1.88  | 1.62 |
| DNAJB9    | NM_012328.1  | DnaJ (Hsp40) homolog, subfamily B, member 9                                       | 2.16 | 1.77  | 1.23 |
| TP53INP1  | NM_033285.2  | tumor protein p53 inducible nuclear protein 1                                     | 2.16 | 1.90  | 2.32 |
| FBXO33    | NM_203301.1  | F-box protein 33                                                                  | 2.15 | 1.75  | 1.06 |
| CCNG2     | NM_004354.1  | cyclin G2                                                                         | 2.15 | 2.48  | 1.39 |
| SCG5      | NM_003020.1  | secretogranin V (7B2 protein)                                                     | 2.14 | 0.68  | 0.92 |
| RICTOR    | NM_152756.3  | rapamycin-insensitive companion of mTOR                                           | 2.14 | 1.79  | 1.61 |
| CALCOCO1  | NM_020898.1  | calcium binding and coiled-coil domain 1                                          | 2.14 | 0.92  | 0.96 |
| CLNDND1   | NM_019895.2  | claudin domain containing 1                                                       | 2.14 | 1.22  | 1.18 |
| JMJD1A    | NM_018433.3  | jumonji domain containing 1A                                                      | 2.14 | 1.85  | 1.51 |
| SIRT1     | NM_012238.3  | sirtuin (silent mating type information regulation 2 homolog) 1 (S. cerevisiae)   | 2.13 | 1.55  | 1.30 |
| ALS2CR13  | NM_173511.2  | amyotrophic lateral sclerosis 2 (juvenile) chromosome region, candidate 13        | 2.13 | 1.18  | 1.07 |
| ZFP36     | NM_003407.1  | zinc finger protein 36, C3H type, homolog (mouse)                                 | 2.11 | 2.65  | 1.56 |
| ANG       | NM_001145.2  | angiogenin, ribonuclease, RNase A family, 5                                       | 2.11 | 2.04  | 1.52 |
| FDPS      | NM_002004.2  | farnesyl diphosphate synthase (farnesyl pyrophosphate synthetase, dimethylallyl)  | 2.11 | 0.88  | 1.15 |
| TMEM55B   | NM_144568.1  | transmembrane protein 55B                                                         | 2.11 | 1.25  | 1.49 |
| PPP1R10   | NM_002714.2  | protein phosphatase 1, regulatory (inhibitor) subunit 10                          | 2.10 | 0.82  | 0.97 |
| MICA      | NM_000247.1  | MHC class I polypeptide-related sequence A                                        | 2.10 | 1.20  | 1.19 |
| MXD4      | NM_006454.2  | MAX dimerization protein 4                                                        | 2.10 | 2.57  | 1.54 |
| KIAA1683  | NM_025249.1  | KIAA1683                                                                          | 2.09 | 1.10  | 0.82 |
| THRAP6    | NM_080651.1  | mediator complex subunit 30                                                       | 2.09 | 1.07  | 0.96 |
| ZFYVE1    | NM_021260.1  | zinc finger, FYVE domain containing 1                                             | 2.08 | 2.43  | 1.36 |
| ACAT2     | NM_005891.1  | acetyl-Coenzyme A acetyltransferase 2 (acetoacetyl Coenzyme A thiolase)           | 2.07 | 1.01  | 1.01 |
| ANKRD12   | NM_015208.2  | ankyrin repeat domain 12                                                          | 2.07 | 1.61  | 1.32 |
| CIR       | NM_004882.3  | CBF1 interacting corepressor                                                      | 2.07 | 1.20  | 0.85 |
| TULP3     | NM_003324.3  | tubby like protein 3                                                              | 2.07 | 1.30  | 1.00 |
| WISP3     | NM_198239.1  | WNT1 inducible signaling pathway protein 3                                        | 2.07 | 0.84  | 1.26 |
| MVK       | NM_000431.1  | mevalonate kinase (mevalonic aciduria)                                            | 2.06 | 1.68  | 1.46 |
| APAF1     | NM_181861.1  | apoptotic peptidase activating factor 1                                           | 2.05 | 1.75  | 1.26 |
| DNAJB6    | NM_058246.3  | DnaJ (Hsp40) homolog, subfamily B, member 6                                       | 2.05 | 1.17  | 1.41 |
| DUSP10    | NM_007207.3  | dual specificity phosphatase 10                                                   | 2.05 | 1.08  | 1.37 |
| HS.222909 | AL117578     | chromosome 21 open reading frame 30                                               | 2.04 | 0.99  | 1.04 |
| KLF11     | XM_938887.1  | PREDICTED: Homo sapiens Kruppel-like factor 11 (KLF11), mRNA.                     | 2.04 | 1.65  | 1.39 |
| JUND      | NM_005354.3  | jun D proto-oncogene                                                              | 2.03 | 4.42  | 1.76 |
| TBC1D15   | NM_022771.3  | TBC1 domain family, member 15                                                     | 2.03 | 1.22  | 1.29 |
| CENPQ     | NM_018132.3  | centromere protein Q                                                              | 2.03 | 1.24  | 1.13 |
| KATNAL1   | NM_001014380 | katanin p60 subunit A-like 1                                                      | 2.02 | 1.11  | 1.19 |
| FLJ39575  | NM_182597.1  | chromosome 7 open reading frame 53                                                | 2.02 | 1.34  | 2.18 |
| IRF6      | NM_006147.2  | interferon regulatory factor 6                                                    | 2.02 | 1.21  | 0.92 |
| WDR20     | NM_181291.1  | WD repeat domain 20                                                               | 2.02 | 1.50  | 1.68 |
| MORC3     | NM_015358.1  | MORC family CW-type zinc finger 3                                                 | 2.01 | 1.35  | 1.14 |
| C8ORF61   | NM_001034061 | ceroid-lipofuscinosis, neuronal 8 (epilepsy, progressive with mental retardation) | 2.01 | 1.15  | 2.00 |
| DSCR1     | NM_203418.1  | regulator of calcineurin 1                                                        | 2.01 | 2.04  | 0.76 |
| KLHL21    | NM_014851.2  | kelch-like 21 (Drosophila)                                                        | 2.01 | 1.58  | 1.32 |
| YPEL5     | NM_016061.1  | yippee-like 5 (Drosophila)                                                        | 2.01 | 1.89  | 1.77 |
| ITLN2     | NM_080878.2  | intelectin 2                                                                      | 2.01 | 0.87  | 0.87 |
| TIPARP    | NM_015508.2  | TCDD-inducible poly(ADP-ribose) polymerase                                        | 2.00 | 1.00  | 0.78 |
| NDRG1     | NM_006096.2  | N-myc downstream regulated gene 1                                                 | 2.00 | 2.69  | 3.65 |
| RRAGC     | NM_022157.2  | Ras-related GTP binding C                                                         | 2.00 | 2.53  | 1.20 |

Genes downregulated by TAlII; ranked based on BT474

| TargetID | Accession   | GeneDescription                     | BT474 | MDAMB231 | MCF10A |
|----------|-------------|-------------------------------------|-------|----------|--------|
| JUB      | NM_032876.4 | jub, ajuba homolog (Xenopus laevis) | 0.40  | 0.49     | 0.92   |
| LMCD1    | NM_014583.2 | LIM and cysteine-rich domains 1     | 0.40  | 0.95     | 0.79   |
| RASL11B  | NM_023940.2 | RAS-like, family 11, member B       | 0.40  | 0.94     | 0.99   |

|            |              |                                                                                 |      |      |      |
|------------|--------------|---------------------------------------------------------------------------------|------|------|------|
| REGG       | NM_032918.1  | RAS-like, estrogen-regulated, growth inhibitor                                  | 0.40 | 1.12 | 0.74 |
| DUSP5      | NM_004419.3  | dual specificity phosphatase 5                                                  | 0.39 | 1.64 | 1.13 |
| DUSP6      | NM_001946.2  | dual specificity phosphatase 6                                                  | 0.39 | 0.73 | 0.73 |
| ZNF703     | XM_001129663 | zinc finger protein 703                                                         | 0.39 | 0.54 | 1.30 |
| C9ORF3     | NM_032823.3  | chromosome 9 open reading frame 3                                               | 0.39 | 0.64 | 1.06 |
| CALML5     | NM_017422.3  | calmodulin-like 5                                                               | 0.39 | 0.91 | 0.80 |
| BAMBI      | NM_012342.2  | BMP and activin membrane-bound inhibitor homolog (Xenopus laevis)               | 0.39 | 1.18 | 1.07 |
| PUNC       | NM_004884.2  | putative neuronal cell adhesion molecule                                        | 0.39 | 0.85 | 0.85 |
| MYC        | NM_002467.3  | v-myc myelocytomatosis viral oncogene homolog (avian)                           | 0.38 | 0.97 | 0.85 |
| DLX3       | NM_005220.2  | distal-less homeobox 3                                                          | 0.38 | 1.07 | 0.84 |
| ARID5B     | NM_032199.1  | AT rich interactive domain 5B (MRF1-like)                                       | 0.38 | 1.68 | 1.46 |
| HS.374257  | BX537506     | hypothetical protein LOC286167                                                  | 0.38 | 0.92 | 0.67 |
| DUSP4      | NM_001394.5  | dual specificity phosphatase 4                                                  | 0.38 | 0.57 | 1.04 |
| ST3GAL1    | NM_173344.1  | ST3 beta-galactoside alpha-2,3-sialyltransferase 1                              | 0.38 | 0.95 | 0.81 |
| SFRS7      | NM_001031684 | splicing factor, arginine/serine-rich 7, 35kDa                                  | 0.38 | 0.59 | 0.66 |
| HS.25892   | AK096179     | chromosome 7 open reading frame 40                                              | 0.38 | 0.62 | 0.90 |
| CITED4     | NM_133467.2  | Cbp/p300-interacting transactivator, with Glu/Asp-rich carboxy-terminal domain, | 0.37 | 0.96 | 0.51 |
| SPRED1     | NM_152594.1  | sprouty-related, EVH1 domain containing 1                                       | 0.36 | 0.96 | 1.27 |
| LOC145837  | XM_934770.1  | PREDICTED: Homo sapiens hypothetical protein LOC145837, transcript variant      | 0.36 | 0.62 | 1.01 |
| CXCR4      | NM_003467.2  | chemokine (C-X-C motif) receptor 4                                              | 0.36 | 0.84 | 2.94 |
| SMAD6      | NM_005585.3  | SMAD family member 6                                                            | 0.36 | 0.55 | 1.02 |
| ATOH8      | NM_032827.3  | atonal homolog 8 (Drosophila)                                                   | 0.35 | 0.72 | 0.83 |
| C8ORF72    | NM_147189.2  | family with sequence similarity 110, member B                                   | 0.35 | 0.98 | 0.92 |
| THBS1      | NM_003246.2  | thrombospondin 1                                                                | 0.34 | 0.83 | 0.60 |
| ENC1       | NM_003633.1  | ectodermal-neural cortex (with BTB-like domain)                                 | 0.34 | 0.49 | 0.85 |
| IER3       | NM_003897.3  | immediate early response 3                                                      | 0.34 | 1.38 | 0.82 |
| RRS1       | NM_015169.3  | RRS1 ribosome biogenesis regulator homolog (S. cerevisiae)                      | 0.34 | 0.31 | 0.45 |
| SLC16A6    | NM_004694.2  | solute carrier family 16, member 6 (monocarboxylic acid transporter 7)          | 0.34 | 0.57 | 0.72 |
| ID1        | NM_181353.1  | inhibitor of DNA binding 1, dominant negative helix-loop-helix protein          | 0.33 | 0.25 | 0.90 |
| EDARADD    | NM_080738.2  | EDAR-associated death domain                                                    | 0.32 | 0.92 | 1.13 |
| MICALCL    | NM_032867.2  | MICAL C-terminal like                                                           | 0.32 | 0.89 | 1.08 |
| ASCL2      | NM_005170.2  | achaete-scute complex homolog 2 (Drosophila)                                    | 0.32 | 1.18 | 1.11 |
| DUSP4      | NM_001394.5  | dual specificity phosphatase 4                                                  | 0.31 | 0.74 | 0.78 |
| EPN3       | NM_017957.1  | epsin 3                                                                         | 0.30 | 0.87 | 0.67 |
| CCND1      | NM_053056.2  | cyclin D1                                                                       | 0.30 | 0.67 | 0.85 |
| ALDH1A3    | NM_000693.1  | aldehyde dehydrogenase 1 family, member A3                                      | 0.30 | 0.96 | 0.76 |
| KIAA0644   | NM_014817.3  | KIAA0644 gene product                                                           | 0.30 | 0.94 | 1.16 |
| STC2       | NM_003714.2  | stanniocalcin 2                                                                 | 0.29 | 1.42 | 2.91 |
| TMEM46     | NM_001007538 | transmembrane protein 46                                                        | 0.27 | 1.12 | 0.74 |
| SLITRK6    | NM_032229.2  | SLIT and NTRK-like family, member 6                                             | 0.26 | 1.04 | 0.83 |
| SPRY1      | NM_199327.1  | sprouty homolog 1, antagonist of FGF signaling (Drosophila)                     | 0.26 | 0.39 | 1.10 |
| RND3       | NM_005168.3  | Rho family GTPase 3                                                             | 0.26 | 0.89 | 1.35 |
| IGFBP3     | NM_000598.4  | insulin-like growth factor binding protein 3                                    | 0.24 | 0.87 | 0.78 |
| DKFZP761P0 | XM_937796.2  | homolog of rat pragra of Rnd2                                                   | 0.22 | 0.62 | 1.06 |
| GATA3      | NM_001002295 | GATA binding protein 3                                                          | 0.22 | 0.47 | 0.75 |
| PPP1R3C    | NM_005398.3  | protein phosphatase 1, regulatory (inhibitor) subunit 3C                        | 0.21 | 1.41 | 1.27 |
| DKK1       | NM_012242.2  | dickkopf homolog 1 (Xenopus laevis)                                             | 0.16 | 0.40 | 0.76 |

Genes upregulated by TAlII; ranked based on MDAMB231

| TargetID  | Accession    | GeneDescription                                                                  | MDAMB231 | BT474 | MCF10A |
|-----------|--------------|----------------------------------------------------------------------------------|----------|-------|--------|
| RHOB      | NM_004040.2  | ras homolog gene family, member B                                                | 15.34    | 2.28  | 2.52   |
| ATF3      | NM_001674.2  | activating transcription factor 3                                                | 13.42    | 4.48  | 3.30   |
| TSC22D3   | NM_004089.3  | TSC22 domain family, member 3                                                    | 11.16    | 1.13  | 1.58   |
| DDIT4     | NM_019058.2  | DNA-damage-inducible transcript 4                                                | 9.64     | 1.04  | 1.30   |
| CTH       | NM_001902.4  | cystathionase (cystathionine gamma-lyase)                                        | 8.24     | 1.30  | 2.83   |
| INSIG1    | NM_198337.1  | insulin induced gene 1                                                           | 6.14     | 8.71  | 1.84   |
| CTH       | NM_001902.4  | cystathionase (cystathionine gamma-lyase)                                        | 6.02     | 1.25  | 1.61   |
| LOC153222 | NM_153607.1  | chromosome 5 open reading frame 41 LRF                                           | 5.44     | 6.28  | 2.74   |
| KLF9      | NM_001206.2  | Kruppel-like factor 9                                                            | 5.30     | 1.63  | 1.86   |
| CHAC1     | NM_024111.2  | ChaC, cation transport regulator homolog 1 (E. coli)                             | 5.21     | 0.74  | 1.39   |
| KLF2      | NM_016270.2  | Kruppel-like factor 2 (lung)                                                     | 4.95     | 3.22  | 4.70   |
| ADM2      | NM_024866.4  | adrenomedullin 2                                                                 | 4.92     | 0.69  | 1.68   |
| ULK1      | XM_942125.1  | PREDICTED: Homo sapiens unc-51-like kinase 1 (C. elegans) (ULK1), mRNA.          | 4.85     | 1.49  | 3.57   |
| ULK1      | NM_003565.1  | unc-51-like kinase 1 (C. elegans)                                                | 4.80     | 1.61  | 3.47   |
| DDIT3     | NM_004083.4  | DNA-damage-inducible transcript 3                                                | 4.68     | 0.81  | 1.40   |
| HERPUD1   | NM_001010989 | homocysteine-inducible, endoplasmic reticulum stress-inducible, ubiquitin-like d | 4.65     | 1.35  | 1.25   |
| JUND      | NM_005354.3  | jun D proto-oncogene                                                             | 4.42     | 2.03  | 1.76   |
| ASNS      | NM_133436.1  | asparagine synthetase                                                            | 4.38     | 1.09  | 2.12   |
| INSIG1    | NM_198336.1  | insulin induced gene 1                                                           | 4.34     | 4.72  | 1.70   |
| TRIB3     | NM_021158.3  | tribbles homolog 3 (Drosophila)                                                  | 4.12     | 0.71  | 1.89   |
| SESN2     | NM_031459.3  | sestrin 2                                                                        | 3.88     | 0.81  | 1.71   |
| CDKN1A    | NM_000389.2  | cyclin-dependent kinase inhibitor 1A (p21, Cip1)                                 | 3.86     | 2.54  | 1.19   |
| DUSP1     | NM_004417.2  | dual specificity phosphatase 1                                                   | 3.68     | 2.98  | 1.86   |

|            |              |                                                                                     |      |      |      |
|------------|--------------|-------------------------------------------------------------------------------------|------|------|------|
| CREB5      | NM_182899.3  | cAMP responsive element binding protein 5                                           | 3.59 | 3.81 | 1.76 |
| PIM1       | NM_002648.2  | pim-1 oncogene                                                                      | 3.57 | 4.13 | 1.76 |
| SQSTM1     | NM_003900.3  | sequestosome 1                                                                      | 3.51 | 1.87 | 1.69 |
| KLF6       | NM_001300.4  | Kruppel-like factor 6                                                               | 3.29 | 2.84 | 1.78 |
| SLC38A2    | NM_018976.3  | solute carrier family 38, member 2                                                  | 3.20 | 1.94 | 1.82 |
| BHLHB2     | NM_003670.1  | basic helix-loop-helix domain containing, class B, 2                                | 3.15 | 0.98 | 1.82 |
| GDF15      | NM_004864.1  | growth differentiation factor 15                                                    | 3.14 | 2.27 | 1.69 |
| ZBTB43     | NM_014007.2  | zinc finger and BTB domain containing 43                                            | 3.13 | 1.59 | 1.79 |
| SLC2A3     | NM_006931.1  | solute carrier family 2 (facilitated glucose transporter), member 3                 | 3.05 | 1.01 | 0.70 |
| PPP1R15A   | NM_014330.2  | protein phosphatase 1, regulatory (inhibitor) subunit 15A                           | 3.01 | 1.46 | 3.53 |
| LOC387763  | XM_941665.2  | hypothetical LOC387763                                                              | 2.97 | 1.06 | 1.20 |
| BTG1       | NM_001731.1  | B-cell translocation gene 1, anti-proliferative                                     | 2.97 | 1.90 | 1.26 |
| SLC3A2     | NM_001013251 | solute carrier family 3 (activators of dibasic and neutral amino acid transport), m | 2.93 | 0.95 | 2.19 |
| PHGDH      | NM_006623.2  | phosphoglycerate dehydrogenase                                                      | 2.89 | 0.99 | 1.66 |
| CEBPB      | NM_005194.2  | CCAAT/enhancer binding protein (C/EBP), beta                                        | 2.87 | 0.73 | 0.83 |
| TNFRSF10D  | NM_003840.3  | tumor necrosis factor receptor superfamily, member 10d, decoy with truncated c      | 2.79 | 1.11 | 2.03 |
| GLS        | NM_014905.2  | glutaminase                                                                         | 2.75 | 1.16 | 3.21 |
| NFIL3      | NM_005384.2  | nuclear factor, interleukin 3 regulated                                             | 2.73 | 1.06 | 1.30 |
| ZFYVE1     | NM_178441.1  | zinc finger, FYVE domain containing 1                                               | 2.71 | 2.63 | 1.74 |
| NDRG1      | NM_006096.2  | N-myc downstream regulated gene 1                                                   | 2.69 | 2.00 | 3.65 |
| KIAA1370   | NM_019600.1  | KIAA1370                                                                            | 2.69 | 1.77 | 2.21 |
| HOXB9      | NM_024017.4  | homeobox B9                                                                         | 2.67 | 0.73 | 1.10 |
| MAP1LC3B   | NM_022818.3  | microtubule-associated protein 1 light chain 3 beta                                 | 2.66 | 1.89 | 1.44 |
| DUSP8      | NM_004420.1  | dual specificity phosphatase 8                                                      | 2.66 | 1.98 | 1.78 |
| ZFP36      | NM_003407.1  | zinc finger protein 36, C3H type, homolog (mouse)                                   | 2.65 | 2.11 | 1.56 |
| LOC88523   | NM_033111.2  | phosphonoformate immuno-associated protein 5                                        | 2.64 | 1.83 | 3.40 |
| ABL2       | NM_005158.2  | v-abl Abelson murine leukemia viral oncogene homolog 2 (arg, Abelson-related        | 2.60 | 1.01 | 2.02 |
| KLHL28     | NM_017658.3  | kelch-like 28 (Drosophila)                                                          | 2.59 | 2.72 | 1.60 |
| ANKRD37    | NM_181726.1  | ankyrin repeat domain 37                                                            | 2.57 | 1.22 | 2.75 |
| MXD1       | NM_002357.2  | MAX dimerization protein 1                                                          | 2.57 | 1.91 | 1.85 |
| MXD4       | NM_006454.2  | MAX dimerization protein 4                                                          | 2.57 | 2.10 | 1.54 |
| KLF6       | NM_001300.4  | Kruppel-like factor 6                                                               | 2.56 | 2.64 | 1.73 |
| FAM100B    | NM_182565.2  | family with sequence similarity 100, member B                                       | 2.56 | 1.60 | 1.70 |
| RRAGC      | NM_022157.2  | Ras-related GTP binding C                                                           | 2.53 | 2.00 | 1.20 |
| CCNG2      | NM_004354.1  | cyclin G2                                                                           | 2.48 | 2.15 | 1.39 |
| HBP1       | NM_012257.3  | HMG-box transcription factor 1                                                      | 2.46 | 3.13 | 1.43 |
| TAF15      | NM_139215.1  | TAF15 RNA polymerase II, TATA box binding protein (TBP)-associated factor, G        | 2.45 | 1.14 | 1.36 |
| PRIC285    | NM_033405.2  | peroxisomal proliferator-activated receptor A interacting complex 285               | 2.44 | 2.51 | 1.76 |
| ZFYVE1     | NM_021260.1  | zinc finger, FYVE domain containing 1                                               | 2.43 | 2.08 | 1.36 |
| GPT2       | NM_133443.1  | glutamic pyruvate transaminase (alanine aminotransferase) 2                         | 2.43 | 0.83 | 1.94 |
| ZCCHC14    | NM_015144.2  | zinc finger, CCHC domain containing 14                                              | 2.43 | 1.29 | 1.71 |
| MNT        | NM_020310.2  | MAX binding protein                                                                 | 2.41 | 2.67 | 1.56 |
| SLC16A3    | NM_001042423 | solute carrier family 16, member 3 (monocarboxylic acid transporter 4)              | 2.41 | 0.91 | 1.26 |
| MIDN       | NM_177401.4  | midnolin                                                                            | 2.39 | 0.61 | 1.44 |
| CCL20      | NM_004591.1  | chemokine (C-C motif) ligand 20                                                     | 2.39 | 1.12 | 0.36 |
| GADD45A    | NM_001924.2  | growth arrest and DNA-damage-inducible, alpha                                       | 2.37 | 0.69 | 1.09 |
| SERTAD1    | NM_013376.1  | SERTA domain containing 1                                                           | 2.37 | 0.94 | 1.55 |
| LDLR       | NM_000527.2  | low density lipoprotein receptor (familial hypercholesterolemia)                    | 2.37 | 3.54 | 1.70 |
| KLHL24     | NM_017644.3  | kelch-like 24 (Drosophila)                                                          | 2.37 | 4.25 | 1.35 |
| GABARAPL1  | NM_031412.2  | GABA(A) receptor-associated protein like 1                                          | 2.33 | 2.26 | 2.06 |
| ARL4A      | NM_005738.3  | ADP-ribosylation factor-like 4A                                                     | 2.33 | 0.72 | 1.17 |
| EGR1       | NM_001964.2  | early growth response 1                                                             | 2.33 | 0.98 | 1.06 |
| XBP1       | NM_005080.2  | X-box binding protein 1                                                             | 2.33 | 0.57 | 1.88 |
| RNF103     | NM_005667.2  | ring finger protein 103                                                             | 2.33 | 1.61 | 2.07 |
| LPIN1      | NM_145693.1  | lipin 1                                                                             | 2.32 | 6.69 | 2.22 |
| SCD        | NM_005063.4  | stearoyl-CoA desaturase (delta-9-desaturase)                                        | 2.31 | 1.30 | 1.07 |
| SLC1A4     | NM_003038.2  | solute carrier family 1 (glutamate/neutral amino acid transporter), member 4        | 2.30 | 0.73 | 3.42 |
| C16ORF72   | NM_014117.2  | chromosome 16 open reading frame 72                                                 | 2.29 | 1.66 | 1.63 |
| CEBPG      | NM_001806.2  | CCAAT/enhancer binding protein (C/EBP), gamma                                       | 2.28 | 1.14 | 1.32 |
| LOC1000085 | NR_003287.1  | 28S ribosomal RNA                                                                   | 2.28 | 3.38 | 0.83 |
| CREB5      | NM_001011666 | cAMP responsive element binding protein 5                                           | 2.26 | 2.25 | 1.58 |
| CDKN1A     | NM_078467.1  | cyclin-dependent kinase inhibitor 1A (p21, Cip1)                                    | 2.24 | 1.09 | 1.09 |
| LOC221442  | NM_001010871 | Homo sapiens hypothetical protein LOC221442 (LOC221442), mRNA.                      | 2.24 | 1.64 | 1.90 |
| MKMK2      | NM_199054.1  | MAP kinase interacting serine/threonine kinase 2                                    | 2.24 | 1.38 | 1.16 |
| CTSK       | NM_000396.2  | cathepsin K                                                                         | 2.23 | 1.89 | 2.34 |
| FOS        | NM_005252.2  | v-fos FBJ murine osteosarcoma viral oncogene homolog                                | 2.22 | 1.15 | 0.74 |
| TES        | NM_015641.2  | testis derived transcript (3 LIM domains)                                           | 2.22 | 1.05 | 1.34 |
| HNRPDL     | NR_003249.1  | heterogeneous nuclear ribonucleoprotein D-like                                      | 2.21 | 1.37 | 1.34 |
| LARP6      | NM_018357.2  | La ribonucleoprotein domain family, member 6                                        | 2.20 | 0.94 | 1.05 |
| PSPH       | NM_004577.3  | phosphoserine phosphatase                                                           | 2.20 | 0.77 | 1.70 |
| FNIP1      | NM_001008738 | folliculin interacting protein 1                                                    | 2.18 | 1.82 | 1.45 |
| PNPLA8     | NM_015723.2  | patatin-like phospholipase domain containing 8                                      | 2.18 | 1.80 | 1.25 |
| TMEM159    | NM_020422.3  | transmembrane protein 159                                                           | 2.18 | 0.92 | 1.43 |
| CCND2      | NM_001759.2  | cyclin D2                                                                           | 2.15 | 0.99 | 1.08 |
| C1ORF63    | NM_207035.1  | Homo sapiens chromosome 1 open reading frame 63 (C1orf63), transcript varia         | 2.15 | 1.94 | 1.90 |

|            |              |                                                                               |      |      |      |
|------------|--------------|-------------------------------------------------------------------------------|------|------|------|
| FAM107B    | NM_031453.2  | family with sequence similarity 107, member B                                 | 2.14 | 1.02 | 1.49 |
| CBX4       | NM_003655.2  | chromobox homolog 4 (Pc class homolog, Drosophila)                            | 2.13 | 0.87 | 1.65 |
| PCK2       | NM_004563.2  | phosphoenolpyruvate carboxykinase 2 (mitochondrial)                           | 2.13 | 1.08 | 1.88 |
| CELSR3     | NM_001407.1  | cadherin, EGF LAG seven-pass G-type receptor 3 (flamingo homolog, Drosophila) | 2.12 | 1.47 | 1.88 |
| MAFG       | NM_032711.2  | v-maf musculoaponeurotic fibrosarcoma oncogene homolog G (avian)              | 2.11 | 1.52 | 2.50 |
| PSAT1      | NM_021154.3  | phosphoserine aminotransferase 1                                              | 2.10 | 0.93 | 1.38 |
| ABL2       | NM_007314.1  | v-abl Abelson murine leukemia viral oncogene homolog 2 (arg, Abelson-related) | 2.09 | 0.96 | 1.01 |
| SC4MOL     | NM_006745.3  | sterol-C4-methyl oxidase-like                                                 | 2.08 | 6.10 | 1.24 |
| SLC6A9     | NM_001024845 | solute carrier family 6 (neurotransmitter transporter, glycine), member 9     | 2.08 | 1.02 | 2.41 |
| SC4MOL     | NM_006745.3  | sterol-C4-methyl oxidase-like                                                 | 2.07 | 7.64 | 1.35 |
| NXF1       | NM_001081491 | nuclear RNA export factor 1                                                   | 2.07 | 1.43 | 1.91 |
| HMGCS1     | NM_002130.4  | 3-hydroxy-3-methylglutaryl-Coenzyme A synthase 1 (soluble)                    | 2.07 | 4.23 | 1.51 |
| RRAD       | NM_004165.1  | Ras-related associated with diabetes                                          | 2.06 | 0.94 | 1.03 |
| TRIB1      | NM_025195.2  | tribbles homolog 1 (Drosophila)                                               | 2.06 | 1.03 | 1.05 |
| TES        | NM_152829.1  | testis derived transcript (3 LIM domains)                                     | 2.06 | 1.14 | 1.21 |
| OTUD1      | XM_001134465 | OTU domain containing 1                                                       | 2.06 | 1.88 | 1.64 |
| FAM53C     | NM_016605.1  | family with sequence similarity 53, member C                                  | 2.06 | 1.74 | 1.41 |
| DSCR1      | NM_203418.1  | regulator of calcineurin 1                                                    | 2.04 | 2.01 | 0.76 |
| ANG        | NM_001145.2  | angiogenin, ribonuclease, RNase A family, 5                                   | 2.04 | 2.11 | 1.52 |
| KIAA0323   | NM_015299.2  | KIAA0323                                                                      | 2.04 | 1.75 | 1.77 |
| RAB33B     | NM_031296.1  | RAB33B, member RAS oncogene family                                            | 2.03 | 1.76 | 1.07 |
| VEGFA      | NM_001025366 | vascular endothelial growth factor A                                          | 2.03 | 0.96 | 2.29 |
| ZDHC11     | NM_024786.1  | zinc finger, DZHC-type containing 11                                          | 2.03 | 1.18 | 2.92 |
| DKFZP451A2 | NM_001003399 | DKFZp451A211 protein                                                          | 2.03 | 1.22 | 1.35 |
| RPS6KA5    | NM_004755.2  | ribosomal protein S6 kinase, 90kDa, polypeptide 5                             | 2.02 | 1.54 | 1.53 |
| TUFT1      | NM_020127.1  | tuftelin 1                                                                    | 2.02 | 1.60 | 1.39 |
| ZSWIM6     | XM_936273.2  | zinc finger, SWIM-type containing 6                                           | 2.02 | 1.56 | 2.00 |
| DIDO1      | NM_080797.2  | death inducer-obliterator 1                                                   | 2.02 | 1.46 | 1.92 |
| TMEM154    | NM_152680.1  | transmembrane protein 154                                                     | 2.01 | 1.16 | 1.27 |
| ARNTL      | NM_001178.4  | aryl hydrocarbon receptor nuclear translocator-like                           | 2.00 | 1.42 | 1.19 |

#### Genes downregulated by TAIII; ranked based on MDAMB231

| TargetID  | Accession    | GeneDescription                                                              | MDAMB231 | BT474 | MCF10A |
|-----------|--------------|------------------------------------------------------------------------------|----------|-------|--------|
| DKK1      | NM_012242.2  | dickkopf homolog 1 (Xenopus laevis)                                          | 0.40     | 0.16  | 0.76   |
| IRS1      | NM_005544.1  | insulin receptor substrate 1                                                 | 0.40     | 0.53  | 0.64   |
| SPRY1     | NM_199327.1  | sprouty homolog 1, antagonist of FGF signaling (Drosophila)                  | 0.39     | 0.26  | 1.10   |
| RCL1      | NM_005772.2  | RNA terminal phosphate cyclase-like 1                                        | 0.39     | 0.61  | 0.53   |
| TMEM177   | NM_030577.1  | transmembrane protein 177                                                    | 0.39     | 0.61  | 0.73   |
| PRR3      | NM_025263.2  | proline rich 3                                                               | 0.38     | 0.59  | 0.85   |
| SPRY1     | NM_199327.1  | sprouty homolog 1, antagonist of FGF signaling (Drosophila)                  | 0.38     | 0.43  | 0.87   |
| LOC728285 | XM_001127070 | similar to keratin associated protein 2-4                                    | 0.38     | 1.04  | 0.98   |
| SHROOM2   | NM_001649.2  | shroom family member 2                                                       | 0.38     | 0.86  | 0.72   |
| ALDH1B1   | NM_000692.3  | aldehyde dehydrogenase 1 family, member B1                                   | 0.37     | 0.78  | 0.50   |
| ZNF239    | NM_005674.1  | zinc finger protein 239                                                      | 0.36     | 0.87  | 0.58   |
| PRMT6     | NM_018137.1  | protein arginine methyltransferase 6                                         | 0.36     | 0.44  | 0.55   |
| MMACHC    | NM_015506.1  | methylmalonic aciduria (cobalamin deficiency) cblC type, with homocystinuria | 0.36     | 0.45  | 0.56   |
| HAS2      | NM_005328.1  | hyaluronan synthase 2                                                        | 0.34     | 0.74  | 1.05   |
| ZNF485    | NM_145312.2  | zinc finger protein 485                                                      | 0.33     | 0.47  | 0.55   |
| FJX1      | NM_014344.2  | four jointed box 1 (Drosophila)                                              | 0.33     | 0.50  | 0.65   |
| NOG       | NM_005450.2  | noggin                                                                       | 0.33     | 0.75  | 0.84   |
| NDP       | NM_000266.1  | Norrie disease (pseudoglioma)                                                | 0.32     | 0.96  | 0.95   |
| RRS1      | NM_015169.3  | RRS1 ribosome biogenesis regulator homolog (S. cerevisiae)                   | 0.31     | 0.34  | 0.45   |
| RIN2      | NM_018993.2  | Ras and Rab interactor 2                                                     | 0.30     | 0.79  | 0.63   |
| BMP4      | NM_130850.1  | bone morphogenetic protein 4                                                 | 0.28     | 1.05  | 0.77   |
| BDNF      | NM_001709.3  | brain-derived neurotrophic factor                                            | 0.26     | 1.09  | 0.89   |
| ID1       | NM_181353.1  | inhibitor of DNA binding 1, dominant negative helix-loop-helix protein       | 0.25     | 0.33  | 0.90   |
| RGS4      | NM_005613.3  | regulator of G-protein signaling 4                                           | 0.25     | 0.99  | 0.97   |
| ID3       | NM_002167.2  | inhibitor of DNA binding 3, dominant negative helix-loop-helix protein       | 0.13     | 0.69  | 0.79   |

#### Genes upregulated by TAIII; ranked based on MCF10A

| TargetID | Accession   | GeneDescription                                                              | MCF10A | BT474 | MDAMB231 |
|----------|-------------|------------------------------------------------------------------------------|--------|-------|----------|
| RASIP1   | NM_017805.2 | Ras interacting protein 1                                                    | 7.08   | 1.09  | 1.06     |
| KLF2     | NM_016270.2 | Kruppel-like factor 2 (lung)                                                 | 4.70   | 3.22  | 4.95     |
| NDRG1    | NM_006096.2 | N-myc downstream regulated gene 1                                            | 3.65   | 2.00  | 2.69     |
| ULK1     | XM_942125.1 | PREDICTED: Homo sapiens unc-51-like kinase 1 (C. elegans) (ULK1), mRNA.      | 3.57   | 1.49  | 4.85     |
| PPP1R15A | NM_014330.2 | protein phosphatase 1, regulatory (inhibitor) subunit 15A                    | 3.53   | 1.46  | 3.01     |
| ULK1     | NM_003565.1 | unc-51-like kinase 1 (C. elegans)                                            | 3.47   | 1.61  | 4.80     |
| SLC1A4   | NM_003038.2 | solute carrier family 1 (glutamate/neutral amino acid transporter), member 4 | 3.42   | 0.73  | 2.30     |
| LOC88523 | NM_033111.2 | phosphonoformate immuno-associated protein 5                                 | 3.40   | 1.83  | 2.64     |
| CLDN15   | NM_014343.1 | claudin 15                                                                   | 3.38   | 1.79  | 1.58     |

|           |              |                                                                                     |      |      |       |
|-----------|--------------|-------------------------------------------------------------------------------------|------|------|-------|
| LOC728715 | XM_001128260 | similar to cDNA sequence BC048546                                                   | 3.32 | 1.63 | 1.68  |
| ATF3      | NM_001674.2  | activating transcription factor 3                                                   | 3.30 | 4.48 | 13.41 |
| GLS       | NM_014905.2  | glutaminase                                                                         | 3.21 | 1.16 | 2.75  |
| MFNG      | NM_002405.2  | MFNG O-fucosylpeptide 3-beta-N-acetylglucosaminyltransferase                        | 2.95 | 1.11 | 1.14  |
| CXCR4     | NM_003467.2  | chemokine (C-X-C motif) receptor 4                                                  | 2.94 | 0.36 | 0.84  |
| ZDHHC11   | NM_024786.1  | zinc finger, DHHC-type containing 11                                                | 2.92 | 1.18 | 2.03  |
| CXCR4     | NM_003467.2  | chemokine (C-X-C motif) receptor 4                                                  | 2.91 | 0.46 | 1.28  |
| STC2      | NM_003714.2  | stanniocalcin 2                                                                     | 2.91 | 0.29 | 1.42  |
| CTH       | NM_001902.4  | cystathionase (cystathionine gamma-lyase)                                           | 2.83 | 1.30 | 8.24  |
| ANKRD37   | NM_181726.1  | ankyrin repeat domain 37                                                            | 2.75 | 1.22 | 2.57  |
| LOC153222 | NM_153607.1  | chromosome 5 open reading frame 41                                                  | 2.74 | 6.28 | 5.44  |
| P2RY11    | NM_002566.4  | purinergic receptor P2Y, G-protein coupled, 11                                      | 2.73 | 1.70 | 0.93  |
| C7ORF41   | NM_152793.2  | chromosome 7 open reading frame 41                                                  | 2.66 | 1.32 | 1.67  |
| MC1R      | NM_002386.2  | melanocortin 1 receptor (alpha melanocyte stimulating hormone receptor)             | 2.60 | 1.43 | 1.60  |
| RHOB      | NM_004040.2  | ras homolog gene family, member B                                                   | 2.52 | 2.28 | 15.34 |
| AMH       | NM_000479.2  | anti-Mullerian hormone                                                              | 2.51 | 1.16 | 1.68  |
| CD7       | NM_006137.6  | CD7 molecule                                                                        | 2.51 | 1.49 | 1.02  |
| MAFG      | NM_032711.2  | v-maf musculoaponeurotic fibrosarcoma oncogene homolog G (avian)                    | 2.50 | 1.52 | 2.11  |
| EPB41L5   | NM_020909.2  | erythrocyte membrane protein band 4.1 like 5                                        | 2.46 | 1.55 | 1.49  |
| LAMB3     | NM_000228.2  | laminin, beta 3                                                                     | 2.46 | 0.78 | 1.87  |
| RHBDL1    | NM_003961.1  | rhomboid, veinlet-like 1 (Drosophila)                                               | 2.43 | 1.65 | 1.20  |
| SLC6A9    | NM_001024845 | solute carrier family 6 (neurotransmitter transporter, glycine), member 9           | 2.41 | 1.02 | 2.08  |
| LYST      | NM_000081.2  | lysosomal trafficking regulator                                                     | 2.40 | 1.50 | 1.77  |
| CTSK      | NM_000396.2  | cathepsin K                                                                         | 2.34 | 1.89 | 2.23  |
| SLC7A11   | NM_014331.3  | solute carrier family 7, (cationic amino acid transporter, y+ system) member 11     | 2.34 | 1.01 | 1.99  |
| EIF5      | NM_001969.3  | eukaryotic translation initiation factor 5                                          | 2.33 | 1.21 | 1.31  |
| TP53INP1  | NM_033285.2  | tumor protein p53 inducible nuclear protein 1                                       | 2.32 | 2.16 | 1.90  |
| ERBB3     | NM_001982.2  | v-erb-b2 erythroblastic leukemia viral oncogene homolog 3 (avian)                   | 2.31 | 1.59 | 1.12  |
| VEGFA     | NM_001025366 | vascular endothelial growth factor A                                                | 2.29 | 0.96 | 2.03  |
| SLC45A4   | XM_933796.2  | solute carrier family 45, member 4                                                  | 2.27 | 1.63 | 1.58  |
| CECR7     | XM_927968.1  | cat eye syndrome chromosome region, candidate 7                                     | 2.26 | 1.25 | 1.18  |
| HSPA6     | NM_002155.3  | heat shock 70kDa protein 6 (HSP70B')                                                | 2.26 | 2.53 | 1.17  |
| PFKFB4    | NM_004567.2  | 6-phosphofructo-2-kinase/fructose-2,6-bisphosphatase 4                              | 2.25 | 1.40 | 1.79  |
| KIAA0182  | NM_014615.1  | KIAA0182                                                                            | 2.24 | 0.91 | 1.40  |
| LPIN1     | NM_145693.1  | lipin 1                                                                             | 2.22 | 6.69 | 2.31  |
| ZNF398    | NM_170686.1  | zinc finger protein 398                                                             | 2.21 | 1.51 | 1.30  |
| MGC16121  | XM_001128419 | hypothetical protein MGC16121                                                       | 2.21 | 0.93 | 1.68  |
| KIAA1370  | NM_019600.1  | KIAA1370                                                                            | 2.21 | 1.77 | 2.69  |
| LTB4R     | NM_181657.1  | leukotriene B4 receptor                                                             | 2.20 | 1.58 | 1.47  |
| LOC653103 | XM_926036.1  | PREDICTED: Homo sapiens similar to Ankyrin repeat domain protein 11 (Ankyr          | 2.20 | 1.21 | 1.94  |
| ADSSL1    | NM_152328.3  | adenylosuccinate synthase like 1                                                    | 2.19 | 0.81 | 1.16  |
| SLC3A2    | NM_001013251 | solute carrier family 3 (activators of dibasic and neutral amino acid transport), m | 2.19 | 0.95 | 2.93  |
| FLJ39575  | NM_182597.1  | chromosome 7 open reading frame 53                                                  | 2.18 | 2.02 | 1.34  |
| FLJ46906  | XM_928441.1  | hypothetical gene supported by AK128874; BC071813                                   | 2.18 | 0.92 | 1.22  |
| ADAM32    | NM_145004.4  | ADAM metallopeptidase domain 32                                                     | 2.17 | 0.85 | 0.94  |
| BSDC1     | NM_018045.4  | BSD domain containing 1                                                             | 2.17 | 1.70 | 1.72  |
| SPOCK2    | NM_014767.1  | sparc/osteonectin, cwcv and kazal-like domains proteoglycan (testican) 2            | 2.17 | 1.24 | 1.34  |
| DNHD1     | NM_144666.1  | dynein heavy chain domain 1                                                         | 2.16 | 1.86 | 1.44  |
| ZXDC      | NM_025112.4  | ZXD family zinc finger C                                                            | 2.15 | 1.02 | 1.51  |
| CBS       | NM_000071.1  | cystathionine-beta-synthase                                                         | 2.15 | 0.87 | 0.97  |
| AXUD1     | NM_033027.2  | AXIN1 up-regulated 1                                                                | 2.14 | 1.24 | 1.90  |
| KIAA1641  | XM_944061.1  | PREDICTED: Homo sapiens KIAA1641, transcript variant 7 (KIAA1641), mRNA             | 2.14 | 1.25 | 1.53  |
| PLAC8L1   | NM_001029869 | PLAC8-like 1                                                                        | 2.13 | 1.26 | 1.38  |
| AMY2A     | NM_000699.2  | amylase, alpha 2A (pancreatic)                                                      | 2.12 | 1.63 | 0.93  |
| CCDC64    | NM_207311.2  | coiled-coil domain containing 64                                                    | 2.12 | 1.15 | 1.50  |
| ASNS      | NM_133436.1  | asparagine synthetase                                                               | 2.12 | 1.09 | 4.38  |
| MACF1     | NM_012090.3  | microtubule-actin crosslinking factor 1                                             | 2.11 | 1.03 | 1.26  |
| C9ORF24   | NM_032596.3  | chromosome 9 open reading frame 24                                                  | 2.09 | 1.31 | 1.27  |
| RNF103    | NM_005667.2  | ring finger protein 103                                                             | 2.07 | 1.61 | 2.33  |
| VAMP1     | NM_016830.2  | vesicle-associated membrane protein 1 (synaptobrevin 1)                             | 2.07 | 1.00 | 1.42  |
| SPSB3     | NM_080861.3  | splA/ryanodine receptor domain and SOCS box containing 3                            | 2.06 | 1.59 | 1.88  |
| GABARAPL1 | NM_031412.2  | GABA(A) receptor-associated protein like 1                                          | 2.06 | 2.26 | 2.33  |
| ABTB1     | NM_172027.1  | ankyrin repeat and BTB (POZ) domain containing 1                                    | 2.06 | 2.72 | 1.62  |
| LOC440345 | XM_933717.1  | PREDICTED: Homo sapiens hypothetical protein LOC440345, transcript variant          | 2.06 | 1.30 | 1.38  |
| BNIPL     | NM_138278.2  | BCL2/adenovirus E1B 19kD interacting protein like                                   | 2.06 | 2.24 | 1.47  |
| BNPLA7    | NM_152286.2  | patatin-like phospholipase domain containing 7                                      | 2.06 | 1.08 | 1.07  |
| ARID3B    | NM_006465.2  | AT rich interactive domain 3B (BRIGHT-like)                                         | 2.04 | 1.46 | 1.88  |
| GSDML     | NM_001042471 | gasdermin-like                                                                      | 2.04 | 1.91 | 1.15  |
| TNFRSF10D | NM_003840.3  | tumor necrosis factor receptor superfamily, member 10d, decoy with truncated c      | 2.03 | 1.11 | 2.79  |
| ABL2      | NM_005158.2  | v-abl Abelson murine leukemia viral oncogene homolog 2 (arg, Abelson-related        | 2.02 | 1.01 | 2.60  |
| COX19     | NM_001031617 | COX19 cytochrome c oxidase assembly homolog (S. cerevisiae)                         | 2.02 | 1.08 | 1.87  |
| C16ORF79  | NM_182563.2  | chromosome 16 open reading frame 79                                                 | 2.02 | 1.83 | 1.10  |
| SLC25A34  | NM_207348.1  | solute carrier family 25, member 34                                                 | 2.02 | 1.60 | 1.48  |
| ATXN1     | NM_000332.2  | ataxin 1                                                                            | 2.01 | 1.08 | 1.73  |
| CHRNA10   | NM_020402.2  | cholinergic receptor, nicotinic, alpha 10                                           | 2.01 | 1.02 | 1.49  |

|          |              |                                                                                   |      |      |      |
|----------|--------------|-----------------------------------------------------------------------------------|------|------|------|
| RNF24    | NM_007219.2  | ring finger protein 24                                                            | 2.00 | 0.84 | 1.48 |
| C8ORF61  | NM_001034061 | ceroid-lipofuscinosis, neuronal 8 (epilepsy, progressive with mental retardation) | 2.00 | 2.01 | 1.15 |
| ZSWIM6   | XM_936273.2  | zinc finger, SWIM-type containing 6                                               | 2.00 | 1.56 | 2.02 |
| ATXN2L   | XM_939199.1  | PREDICTED: Homo sapiens ataxin 2-like, transcript variant 1 (ATXN2L), mRNA        | 2.00 | 0.95 | 1.67 |
| C6ORF128 | NM_145316.2  | chromosome 6 open reading frame 128                                               | 2.00 | 1.24 | 1.90 |

Genes downregulated by TAI1; ranked based on MCF10A

| TargetID | Accession    | GeneDescription                                                                  | MCF10A | BT474 | MDAMB231 |
|----------|--------------|----------------------------------------------------------------------------------|--------|-------|----------|
| CHST4    | NM_005769.1  | carbohydrate (N-acetylglucosamine 6-O) sulfotransferase 4                        | 0.40   | 0.93  | 0.48     |
| CMAH     | NR_002174.1  | cytidine monophosphate-N-acetylneuraminic acid hydroxylase (CMP-N-acetylne       | 0.39   | 0.65  | 0.79     |
| FST      | NM_013409.1  | follistatin                                                                      | 0.38   | 1.02  | 0.48     |
| MMP9     | NM_004994.2  | matrix metalloproteinase 9 (gelatinase B, 92kDa gelatinase, 92kDa type IV collag | 0.38   | 0.88  | 0.97     |
| TNF      | NM_000594.2  | tumor necrosis factor (TNF superfamily, member 2)                                | 0.37   | 1.12  | 0.91     |
| CCL20    | NM_004591.1  | chemokine (C-C motif) ligand 20                                                  | 0.36   | 1.12  | 2.39     |
| CSF2     | NM_000758.2  | colony stimulating factor 2 (granulocyte-macrophage)                             | 0.34   | 0.92  | 0.92     |
| CXCL2    | NM_002089.1  | chemokine (C-X-C motif) ligand 2                                                 | 0.34   | 0.77  | 1.42     |
| IL7R     | NM_002185.2  | interleukin 7 receptor                                                           | 0.33   | 0.96  | 0.61     |
| CXCR7    | NM_020311.2  | chemokine (C-X-C motif) receptor 7                                               | 0.33   | 0.52  | 0.80     |
| IL7R     | XM_001127146 | interleukin 7 receptor                                                           | 0.32   | 1.22  | 0.66     |
| ZBED2    | NM_024508.3  | zinc finger, BED-type containing 2                                               | 0.32   | 0.97  | 0.99     |
| PTX3     | NM_002852.2  | pentraxin-related gene, rapidly induced by IL-1 beta                             | 0.32   | 1.00  | 0.55     |
| CDH11    | NM_001797.2  | cadherin 11, type 2, OB-cadherin (osteoblast)                                    | 0.31   | 0.96  | 0.88     |
| IL1A     | NM_000575.3  | interleukin 1, alpha                                                             | 0.26   | 0.91  | 1.08     |
| IL8      | NM_000584.2  | interleukin 8                                                                    | 0.24   | 1.20  | 1.58     |
| CXCL1    | NM_001511.1  | chemokine (C-X-C motif) ligand 1 (melanoma growth stimulating activity, alpha)   | 0.22   | 1.20  | 0.75     |
