# Supplementary material for: Timosaponin AIII Is Preferentially Cytotoxic to Tumor Cells through Inhibition of mTOR and Induction of ER Stress
Source: PubMed Central journal article supplement (PMC2747272; doi:10.1371/journal.pone.0007283), 2009-09-30
Supplement: pone.0007283.s003.pdf [file pone.0007283.s003.pdf]

Table S3. Proteomic analysis of MDAMB231 cells treated with TAIII for 4, 8 and 16 hours

| Score | Fold change in abundance over untreated |       |        | Accession | Gene description                                                                                                             |
|-------|-----------------------------------------|-------|--------|-----------|------------------------------------------------------------------------------------------------------------------------------|
|       | 4hrs                                    | 8 hrs | 16 hrs |           |                                                                                                                              |
| 28    | 1.90                                    | 2.43  | 2.75   | HUMAN     | P48643 T-complex protein 1 subunit epsilon OS=Homo sapiens GN=CCT5 PE=1 SV=1                                                 |
| 25    | 1.21                                    | 1.64  | 2.28   | HUMAN     | Q9NX09 DNA-damage-inducible transcript 4 protein OS=Homo sapiens GN=REDD-1 PE=1 SV=2                                         |
| 27    | 1.37                                    | 1.80  | 2.03   | HUMAN     | P62937 Peptidyl-prolyl cis-trans isomerase A OS=Homo sapiens GN=PPIA PE=1 SV=2                                               |
| 19    | 1.65                                    | 1.88  | 1.90   | HUMAN     | Q01105 Protein SET OS=Homo sapiens GN=SET PE=1 SV=3                                                                          |
| 43    | 1.30                                    | 1.54  | 1.81   | HUMAN     | Q07021 Complement component 1 Q subcomponent-binding protein, mitochondrial OS=Homo sapiens GN=C1QBP PE=1 SV=1               |
| 33    | 1.44                                    | 1.63  | 1.77   | RABIT     | P15253 Calreticulin OS=Oryctolagus cuniculus GN=CALR PE=1 SV=1                                                               |
| 39    | 1.27                                    | 1.60  | 1.72   | HUMAN     | P07737 Profilin-1 OS=Homo sapiens GN=PFN1 PE=1 SV=2                                                                          |
| 47    | 1.87                                    | 1.81  | 1.71   | BOVIN     | Q5E9B7 Chloride intracellular channel protein 1 OS=Bos taurus GN=CLIC1 PE=2 SV=3                                             |
| 57    | 1.38                                    | 1.64  | 1.70   | HUMAN     | P07237 Protein disulfide-isomerase OS=Homo sapiens GN=P4HB PE=1 SV=3                                                         |
| 118   | 1.15                                    | 1.21  | 1.22   | BOVIN     | P63103 14-3-3 protein zeta/delta OS=Bos taurus GN=YWHAZ PE=1 SV=1                                                            |
| 21    | 1.06                                    | 1.25  | 1.24   | HUMAN     | O14737 Programmed cell death protein 5 OS=Homo sapiens GN=PDCC5 PE=1 SV=3                                                    |
| 42    | 0.95                                    | 0.86  | 0.56   | HUMAN     | P30041 Peroxiredoxin-6 OS=Homo sapiens GN=PRDX6 PE=1 SV=3                                                                    |
| 23    | 0.71                                    | 0.53  | 0.35   | HUMAN     | P41134 DNA-binding protein inhibitor ID-1 OS=Homo sapiens GN=ID-1 PE=1 SV=1                                                  |
| 22    | 0.63                                    | 0.59  | 0.34   | PIG       | P54613 Serine/threonine-protein phosphatase 2A 65 kDa regulatory subunit A beta isoform OS=Homo sapiens GN=PPP2R1B PE=1 SV=3 |

Only proteins with scores above 20, and whose changes in expression were sustained overtime are shown.
