# Supplementary material for: Timosaponin AIII Is Preferentially Cytotoxic to Tumor Cells through Inhibition of mTOR and Induction of ER Stress
Source: PubMed Central journal article supplement (PMC2747272; doi:10.1371/journal.pone.0007283), 2009-09-30
Supplement: pone.0007283.s005.pdf [file pone.0007283.s005.pdf]

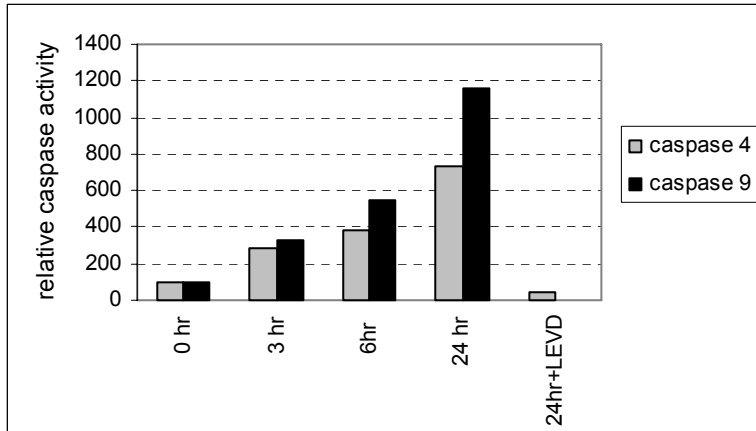

**Figure S1.** Activation of caspases 4 and 9 by BN108. Extracts prepared from BT474 treated with BN108 for indicated times were analyzed for caspase-4 and caspase-9 activity using caspase activity kits from BioVision according to manufacturer's instructions. Caspase 4 inhibitor LEVD (EMD Biosciences) was used at 8  $\mu$ M to ensure the specificity of the assay.
