# Supplementary material for: Timosaponin AIII Is Preferentially Cytotoxic to Tumor Cells through Inhibition of mTOR and Induction of ER Stress
Source: PubMed Central journal article supplement (PMC2747272; doi:10.1371/journal.pone.0007283), 2009-09-30
Supplement: pone.0007283.s007.pdf [file pone.0007283.s007.pdf]

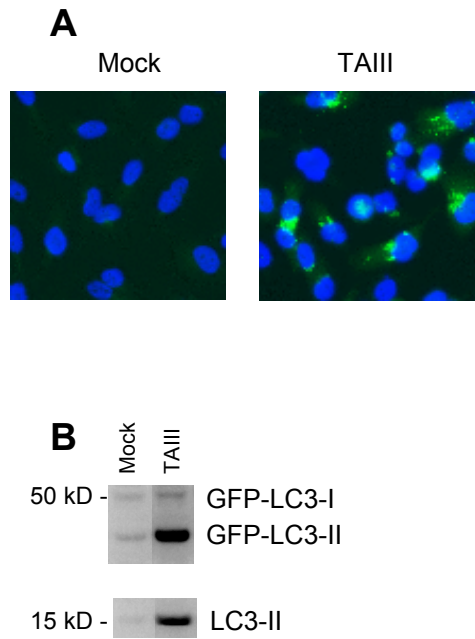

**Figure S3.** TAI II treatment induces autophagy. MDAMB231 cells were transfected with GFP-LC3 expressing construct and subjected to treatment with 5  $\mu$ M of TAI II for 16 hours. **A.** Immunofluorescent detection of EGFP-LC3 in untreated (mock) and treated cells. **B.** Western blot analysis of the same cells treated with TAI II and detected with an antibody to LC3. Both GFP-LC3-I and proteolytically cleaved EGFP-LC3-II are detected. Endogenous LC3-I is not detected due to its low expression levels or antibody preference for LC3-II.
